# Supplementary material
Source: PubMed Central journal article supplement (PMC3957781)
Supplement: JCM.03121-13_zjm999093182so1.pdf [file JCM.03121-13_zjm999093182so1.pdf]

Table S1. Phenotypic and genotypic traits of *V. cholerae* O1 strains in this study

| Year of isolation | Number of strains | Serotype | Phenotype |    |    | Genotype    |             |             |             | Deduced biotype |
|-------------------|-------------------|----------|-----------|----|----|-------------|-------------|-------------|-------------|-----------------|
|                   |                   |          | CCA       | VP | PB | <i>ctxB</i> | <i>rstR</i> | <i>tcpA</i> | <i>rtxC</i> |                 |
| 1961              | 1                 | Ogawa    | +         | -  | R  | E           | E           | E           | +           | Hybrid          |
| 1961              | 2                 | Ogawa    | -         | +  | R  | E           | E           | E           | +           | Hybrid          |
| 1961              | 2                 | Ogawa    | +         | +  | S  | E           | E           | E           | +           | Hybrid          |
| 1961              | 1                 | Ogawa    | +         | +  | R  | E           | E           | E           | -           | El Tor          |
| 1961              | 1                 | Ogawa    | +         | +  | R  | E           | E           | -           | -           | El Tor          |
| 1961              | 2                 | Ogawa    | +         | +  | R  | -           | E           | E           | +           | El Tor          |
| 1961              | 2                 | Ogawa    | +         | +  | R  | E           | E           | -           | +           | El Tor          |
| 1961              | 1                 | Ogawa    | +         | +  | R  | E           | -           | -           | +           | El Tor          |
| 1961              | 19                | Ogawa    | +         | +  | R  | E           | E           | E           | +           | El Tor          |
| 1962              | 1                 | Inaba    | +         | +  | R  | E           | E           | E           | +           | El Tor          |
| 1962              | 1                 | Ogawa    | +         | +  | R  | -           | -           | -           | +           | El Tor          |
| 1962              | 1                 | Ogawa    | +         | +  | S  | E           | E           | E           | +           | Hybrid          |
| 1962              | 1                 | Ogawa    | -         | +  | R  | E           | E           | E           | +           | Hybrid          |
| 1962              | 6                 | Ogawa    | +         | +  | R  | E           | E           | E           | +           | El Tor          |
| 1963              | 1                 | Ogawa    | +         | +  | R  | E           | E           | E           | +           | El Tor          |
| 1963              | 1                 | Ogawa    | +         | +  | R  | -           | -           | -           | +           | El Tor          |
| 1963              | 1                 | Ogawa    | -         | +  | R  | E           | E           | E           | +           | Hybrid          |
| 1964              | 1                 | Ogawa    | +         | +  | R  | -           | E           | E           | +           | El Tor          |
| 1964              | 2                 | Ogawa    | +         | +  | S  | E           | E           | E           | +           | Hybrid          |
| 1964              | 1                 | Ogawa    | +         | -  | R  | -           | -           | -           | +           | Hybrid          |
| 1964              | 2                 | Ogawa    | +         | +  | R  | -           | -           | E           | +           | El Tor          |
| 1964              | 4                 | Ogawa    | +         | +  | R  | E           | E           | E           | +           | El Tor          |
| 1965              | 1                 | Ogawa    | +         | +  | R  | -           | E           | -           | +           | El Tor          |
| 1965              | 1                 | Ogawa    | +         | +  | R  | -           | -           | -           | +           | El Tor          |
| 1965              | 1                 | Ogawa    | -         | +  | R  | -           | E           | -           | +           | Hybrid          |
| 1965              | 1                 | Ogawa    | -         | +  | R  | -           | E           | E           | +           | Hybrid          |
| 1966              | 1                 | Ogawa    | +         | +  | R  | E           | E           | E           | +           | El Tor          |
| 1966              | 1                 | Ogawa    | -         | +  | R  | E           | E           | E           | +           | Hybrid          |
| 1974              | 1                 | Ogawa    | -         | +  | R  | E           | E           | E           | +           | Hybrid          |
| 1974              | 1                 | Ogawa    | +         | -  | R  | E           | E           | E           | +           | Hybrid          |
| 1974              | 1                 | Ogawa    | -         | +  | R  | -           | -           | -           | +           | Hybrid          |
| 1975              | 1                 | Inaba    | +         | +  | R  | -           | -           | -           | +           | El Tor          |
| 1977              | 1                 | Inaba    | +         | +  | R  | E           | E           | E           | +           | El Tor          |
| 1977              | 2                 | Ogawa    | +         | +  | R  | -           | -           | -           | +           | El Tor          |
| 1978              | 1                 | Inaba    | +         | +  | R  | E           | E           | E           | +           | El Tor          |
| 1978              | 1                 | Ogawa    | +         | +  | R  | E           | -           | -           | +           | El Tor          |
| 1978              | 1                 | Ogawa    | -         | -  | R  | E           | E           | E           | +           | Hybrid          |
| 1978              | 4                 | Ogawa    | +         | +  | R  | E           | E           | E           | +           | El Tor          |
| 1979              | 1                 | Inaba    | +         | +  | R  | E           | E           | -           | +           | El Tor          |
| 1979              | 1                 | Inaba    | +         | +  | R  | -           | E           | E           | +           | El Tor          |

|      |    |       |   |   |   |   |     |   |   |        |
|------|----|-------|---|---|---|---|-----|---|---|--------|
| 1979 | 1  | Ogawa | + | - | R | - | E   | E | + | Hybrid |
| 1979 | 1  | Ogawa | + | + | S | - | E   | E | + | Hybrid |
| 1979 | 2  | Ogawa | + | + | R | - | E   | E | + | El Tor |
| 1979 | 2  | Inaba | + | + | R | E | E   | E | + | El Tor |
| 1979 | 2  | Ogawa | + | + | S | E | E   | E | + | Hybrid |
| 1979 | 5  | Ogawa | + | - | R | E | E   | E | + | Hybrid |
| 1979 | 20 | Ogawa | + | + | R | E | E   | E | + | El Tor |
| 1980 | 1  | Ogawa | + | + | R | E | E   | E | + | El Tor |
| 1980 | 1  | Inaba | - | + | R | E | E   | E | + | Hybrid |
| 1980 | 1  | Inaba | - | + | R | - | E   | E | + | Hybrid |
| 1980 | 1  | Inaba | + | + | R | E | E   | - | + | El Tor |
| 1980 | 1  | Inaba | + | + | R | - | E   | E | + | El Tor |
| 1980 | 2  | Inaba | + | - | R | E | E   | E | + | Hybrid |
| 1980 | 18 | Inaba | + | + | R | E | E   | E | + | El Tor |
| 1981 | 1  | Inaba | - | - | S | E | E   | E | + | Hybrid |
| 1981 | 1  | Inaba | - | - | S | - | E   | - | + | Hybrid |
| 1981 | 1  | Inaba | + | + | R | E | -   | E | + | El Tor |
| 1981 | 3  | Ogawa | + | + | R | - | E   | E | + | El Tor |
| 1981 | 1  | Inaba | + | + | R | E | E   | E | + | El Tor |
| 1981 | 8  | Ogawa | + | + | R | E | E   | E | + | El Tor |
| 1982 | 4  | Inaba | + | + | R | E | E   | E | + | El Tor |
| 1983 | 1  | Ogawa | + | + | R | E | E   | E | + | El Tor |
| 1983 | 1  | Inaba | - | + | R | E | -   | E | + | Hybrid |
| 1983 | 4  | Inaba | + | + | R | E | E   | E | + | El Tor |
| 1984 | 1  | Inaba | + | + | R | - | E   | E | + | El Tor |
| 1984 | 1  | Ogawa | - | + | R | E | E   | E | + | Hybrid |
| 1984 | 1  | Inaba | - | + | R | E | E   | E | + | Hybrid |
| 1984 | 2  | Inaba | + | - | R | E | E   | E | + | Hybrid |
| 1984 | 2  | Ogawa | + | + | R | - | E   | E | + | El Tor |
| 1984 | 2  | Ogawa | + | - | R | E | E   | E | + | Hybrid |
| 1984 | 8  | Inaba | + | + | R | E | E   | E | + | El Tor |
| 1984 | 12 | Ogawa | + | + | R | E | E   | E | + | El Tor |
| 1985 | 1  | Ogawa | + | + | R | - | -   | - | + | El Tor |
| 1985 | 1  | Inaba | + | + | R | E | E   | E | + | El Tor |
| 1985 | 1  | Inaba | - | + | R | E | E   | E | + | Hybrid |
| 1985 | 2  | Ogawa | + | - | R | E | E   | E | + | Hybrid |
| 1985 | 10 | Ogawa | + | + | R | E | E   | E | + | El Tor |
| 1986 | 1  | Ogawa | + | + | R | - | E   | E | + | El Tor |
| 1986 | 1  | Inaba | - | - | R | E | E   | E | + | Hybrid |
| 1986 | 1  | Inaba | - | - | S | - | E   | E | + | Hybrid |
| 1986 | 1  | Inaba | + | + | R | E | E/C | E | + | El Tor |
| 1986 | 1  | Ogawa | + | + | R | - | E/C | E | + | El Tor |
| 1986 | 7  | Inaba | + | + | R | E | E   | E | + | El Tor |
| 1987 | 1  | Ogawa | + | + | R | - | -   | E | + | El Tor |

|      |   |       |   |   |   |   |     |   |   |                |
|------|---|-------|---|---|---|---|-----|---|---|----------------|
| 1987 | 1 | Inaba | + | - | R | E | E   | E | + | Hybrid         |
| 1987 | 1 | Inaba | + | + | R | E | E   | E | + | El Tor         |
| 1987 | 2 | Inaba | + | + | R | - | E   | E | + | El Tor         |
| 1988 | 1 | Ogawa | + | + | R | E | E   | E | + | El Tor         |
| 1989 | 1 | Inaba | + | + | R | E | E   | E | + | El Tor         |
| 1990 | 1 | Ogawa | + | + | R | - | E   | E | - | El Tor         |
| 1990 | 2 | Inaba | + | + | R | E | E   | E | + | El Tor         |
| 1990 | 3 | Ogawa | + | + | R | E | E   | E | + | El Tor         |
| 1991 | 1 | Inaba | + | + | R | - | E   | E | + | El Tor         |
| 1991 | 1 | Inaba | + | + | R | E | E   | E | + | El Tor         |
| 1991 | 1 | Ogawa | - | - | R | E | E   | E | + | Hybrid         |
| 1991 | 1 | Ogawa | + | + | R | - | E   | E | + | El Tor         |
| 1991 | 1 | Ogawa | + | + | R | E | E   | - | + | El Tor         |
| 1991 | 6 | Ogawa | + | + | R | E | E   | E | + | El Tor         |
| 1992 | 1 | Ogawa | + | + | R | - | E   | E | + | El Tor         |
| 1992 | 1 | Inaba | + | + | R | C | -   | E | + | El Tor variant |
| 1992 | 5 | Ogawa | + | + | R | E | E   | E | + | El Tor         |
| 1993 | 1 | Ogawa | + | + | R | E | E   | E | + | El Tor         |
| 1993 | 1 | Ogawa | + | + | R | C | E   | E | + | El Tor variant |
| 1993 | 1 | Ogawa | + | + | R | C | E/C | E | + | El Tor variant |
| 1993 | 1 | Ogawa | + | + | R | - | E/C | E | + | El Tor variant |
| 1993 | 1 | Ogawa | + | - | R | E | E   | E | + | Hybrid         |
| 1993 | 1 | Ogawa | + | - | R | E | E/C | E | + | Hybrid         |
| 1993 | 1 | Ogawa | + | - | R | C | E/C | E | + | Hybrid         |
| 1993 | 1 | Inaba | + | + | R | - | E   | - | + | El Tor         |
| 1993 | 1 | Inaba | + | + | R | E | E   | E | + | El Tor         |
| 1993 | 1 | Inaba | + | - | R | C | E/C | E | + | Hybrid         |
| 1993 | 3 | Ogawa | + | - | R | C | E   | E | + | Hybrid         |
| 1994 | 1 | Ogawa | + | + | R | E | E/C | E | + | Hybrid         |
| 1994 | 1 | Ogawa | + | + | R | C | E   | E | + | El Tor variant |
| 1994 | 1 | Ogawa | + | - | S | C | E/C | E | + | Hybrid         |
| 1994 | 1 | Ogawa | - | - | R | C | E/C | E | + | Hybrid         |
| 1994 | 1 | Ogawa | + | + | R | C | E/C | E | + | El Tor variant |
| 1995 | 1 | Ogawa | + | - | R | C | C   | E | + | Hybrid         |
| 1995 | 1 | Ogawa | + | - | R | C | E   | E | + | Hybrid         |
| 1995 | 1 | Ogawa | + | - | R | C | E/C | E | + | Hybrid         |
| 1997 | 1 | Ogawa | + | - | R | C | E/C | - | + | Hybrid         |
| 1998 | 1 | Ogawa | - | + | R | C | C   | E | + | Hybrid         |
| 1998 | 1 | Ogawa | + | + | S | E | C   | E | + | Hybrid         |
| 1998 | 1 | Ogawa | - | - | R | C | C   | E | + | Hybrid         |
| 1998 | 2 | Ogawa | + | + | R | C | C   | E | + | El Tor variant |
| 1998 | 2 | Ogawa | + | - | R | C | C   | E | + | Hybrid         |
| 1998 | 1 | Ogawa | + | - | R | C | E/C | E | + | Hybrid         |
| 1999 | 1 | Inaba | + | + | R | - | -   | E | + | El Tor         |

|      |   |       |   |   |   |   |     |   |   |                |
|------|---|-------|---|---|---|---|-----|---|---|----------------|
| 1999 | 1 | Ogawa | + | + | R | - | C   | E | + | El Tor variant |
| 1999 | 1 | Ogawa | + | - | R | C | E/C | E | + | Hybrid         |
| 1999 | 3 | Ogawa | + | + | R | C | E/C | E | + | El Tor variant |
| 2000 | 1 | Ogawa | + | + | R | E | E   | E | + | El Tor         |
| 2000 | 1 | Inaba | + | + | R | C | -   | E | + | El Tor variant |
| 2000 | 1 | Ogawa | - | + | R | C | E/C | E | + | Hybrid         |
| 2000 | 1 | Ogawa | + | + | R | C | E/C | E | + | El Tor variant |
| 2000 | 1 | Ogawa | + | - | R | C | E/C | E | + | Hybrid         |
| 2000 | 1 | Ogawa | - | - | S | C | C   | E | + | Hybrid         |
| 2001 | 1 | Inaba | + | + | R | E | C   | E | + | Hybrid         |
| 2001 | 1 | Inaba | - | + | R | C | C   | E | + | Hybrid         |
| 2001 | 2 | Ogawa | + | + | R | C | E/C | E | + | El Tor variant |
| 2001 | 3 | Inaba | + | - | R | C | C   | E | + | Hybrid         |
| 2001 | 4 | Inaba | + | + | R | C | C   | E | + | El Tor variant |
| 2002 | 1 | Ogawa | - | + | R | - | -   | - | + | Hybrid         |
| 2002 | 1 | Inaba | + | - | R | C | C   | E | + | Hybrid         |
| 2002 | 2 | Inaba | + | + | R | C | C   | E | + | El Tor variant |
| 2003 | 1 | Inaba | + | + | R | C | C   | E | + | El Tor variant |
| 2004 | 1 | Ogawa | - | + | R | - | C   | - | + | Hybrid         |
| 2004 | 1 | Ogawa | + | + | R | C | E/C | E | + | El Tor variant |
| 2004 | 1 | Inaba | + | + | R | C | -   | E | + | El Tor variant |
| 2004 | 1 | Inaba | + | + | R | - | -   | - | + | El Tor         |
| 2005 | 1 | Ogawa | + | + | R | - | -   | - | + | El Tor         |
| 2005 | 1 | Ogawa | + | + | R | - | E   | E | + | El Tor         |
| 2005 | 1 | Ogawa | + | + | R | C | E/C | E | + | El Tor variant |
| 2005 | 1 | Inaba | + | - | R | C | E   | E | + | Hybrid         |
| 2005 | 1 | Inaba | - | - | R | C | E   | E | + | Hybrid         |
| 2005 | 2 | Ogawa | + | + | R | C | C   | E | + | El Tor variant |
| 2005 | 9 | Inaba | + | + | R | C | E   | E | + | El Tor variant |
| 2006 | 1 | Ogawa | + | + | R | - | -   | - | + | El Tor         |
| 2008 | 1 | Ogawa | + | + | R | - | E   | - | + | El Tor         |
| 2008 | 2 | Ogawa | + | + | R | C | E   | E | + | El Tor variant |
| 2010 | 1 | Ogawa | + | - | R | C | E   | E | + | Hybrid         |
| 2010 | 1 | Ogawa | + | + | R | C | E   | E | + | El Tor variant |

---

330

---

CCA, chicken red blood cell agglutination; VP, Voges-Proskauer test; PB, susceptibility to 50 units of polymyxin B; R, resistant; S, sensitive; +, positive; -, negative; C, classical; E, El Tor
